# Supplementary material for: Satellite-based evaluation of AeroCom model bias in biomass burning regions
Source: Copernicus journal article supplement (doi:10.5194/acp-22-11009-2022), 2022-08-31
Supplement: Supplementary file 1 [file acp-22-11009-2022-supplement.zip]

Archive with 2 entries (2 files):
- acp-22-11009-2022-supplement-title-page.pdf
- Appendix_CTRL16_19_summary.xlsx
