# Supplementary material for: Satellite-based evaluation of AeroCom model bias in biomass burning regions
Source: Copernicus journal article supplement (doi:10.5194/acp-22-11009-2022), 2022-08-31
Supplement: Supplementary file 1 [file acp-22-11009-2022-supplement.zip › acp-22-11009-2022-supplement-title-page.pdf]

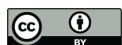

*Supplement of*

## **Satellite-based evaluation of AeroCom model bias in biomass burning regions**

**Qirui Zhong et al.**

*Correspondence to:* Qirui Zhong (q.zhong@vu.nl)

- [acp-22-11009-2022-supplement-title-page.pdf](#)
- [Appendix\\_CTRL16\\_19\\_summary.xlsx](#)

The copyright of individual parts of the supplement might differ from the article licence.
